# Supplementary material
Source: publisher figshare collection journal article supplement (https://gsajournals.figshare.com/articles/dataset/_/6453092)

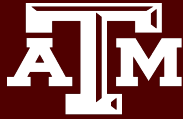

## gQTL v1.0

*A web application to run QTL analysis on Collaborative Cross Mice.*

- **1. Outlier Strains**
- **2. Basic Plots**
  - 2.1 Histogram Plot(s)
  - 2.2 QQ Plot(s)
  - 2.3 Histogram Plot(s) (Normalized, Data Transformation: AUTO)
  - 2.4 QQ Plot(s) (Normalized, Data Transformation: AUTO)
- **3 QTL Analysis**
  - 3.1 Significant Thresholds
  - 3.2 Manhattan Plot(s)
  - 3.3 Significant QTL
  - 3.4 Allele Effects Plot(s)

### Outlier Strains

---

|                        |                     |
|------------------------|---------------------|
| Acox1.Liver.Expression | CC010, CC016, CC004 |
| TCE.in.Liver           | CC016               |

### Basic Plots

---

Histogram Plot

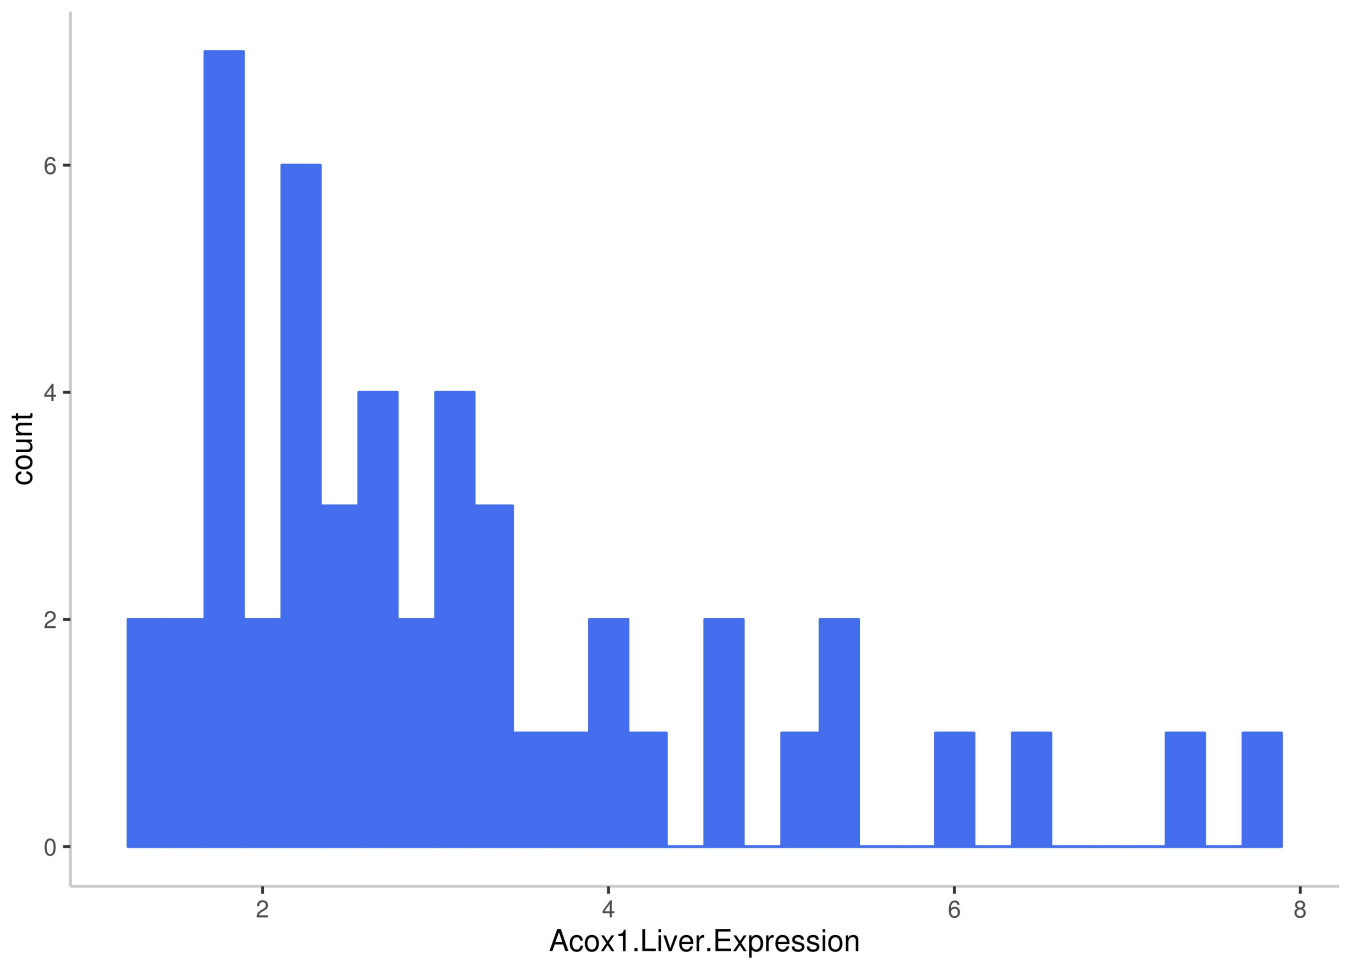

```
## Warning: Removed 4 rows containing non-finite values (stat_bin).
```

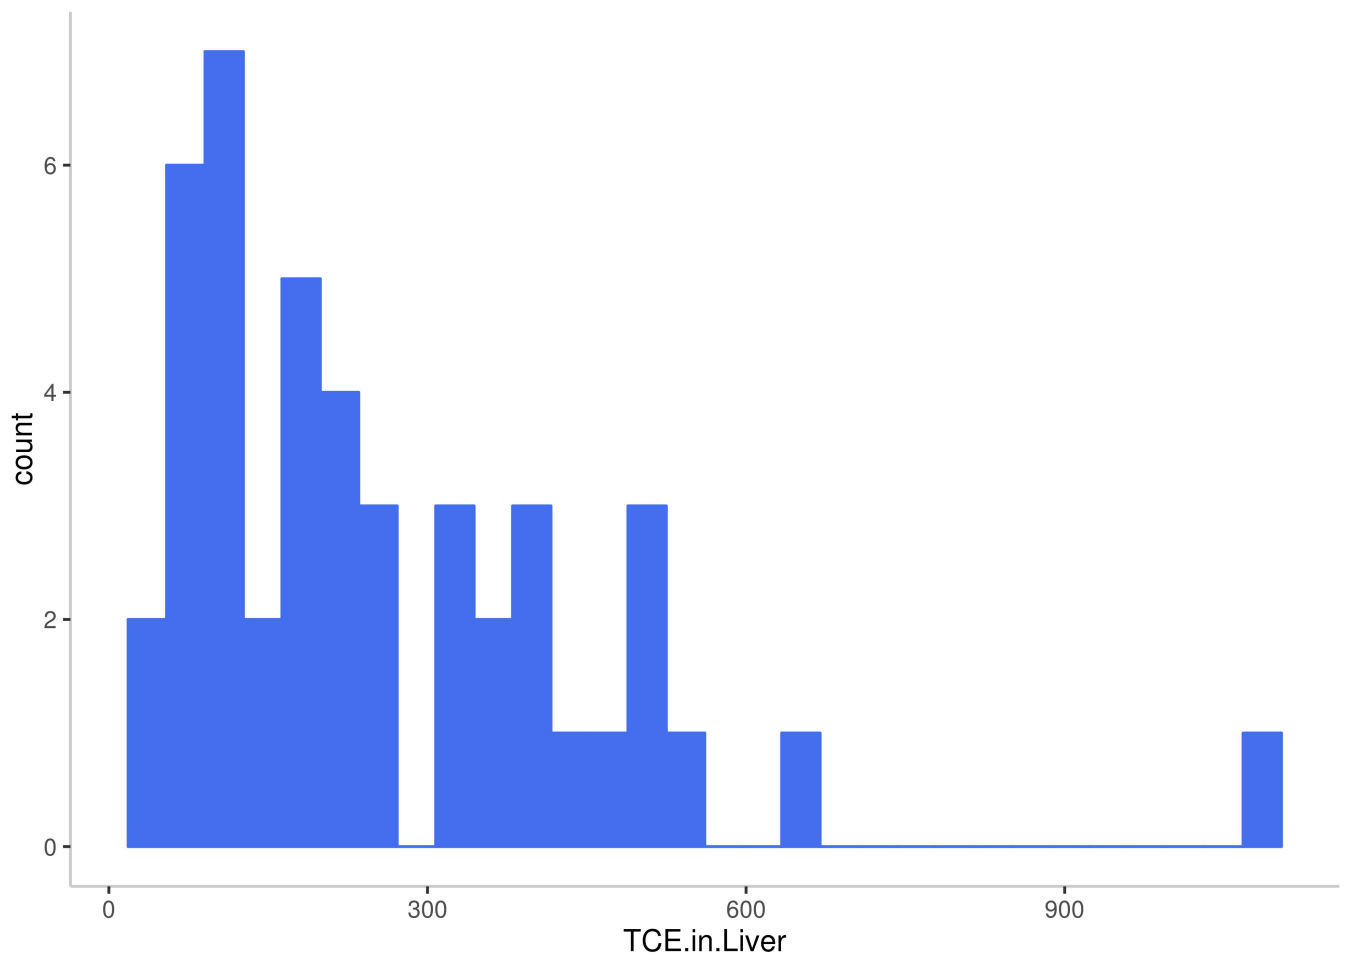

QQ Plot

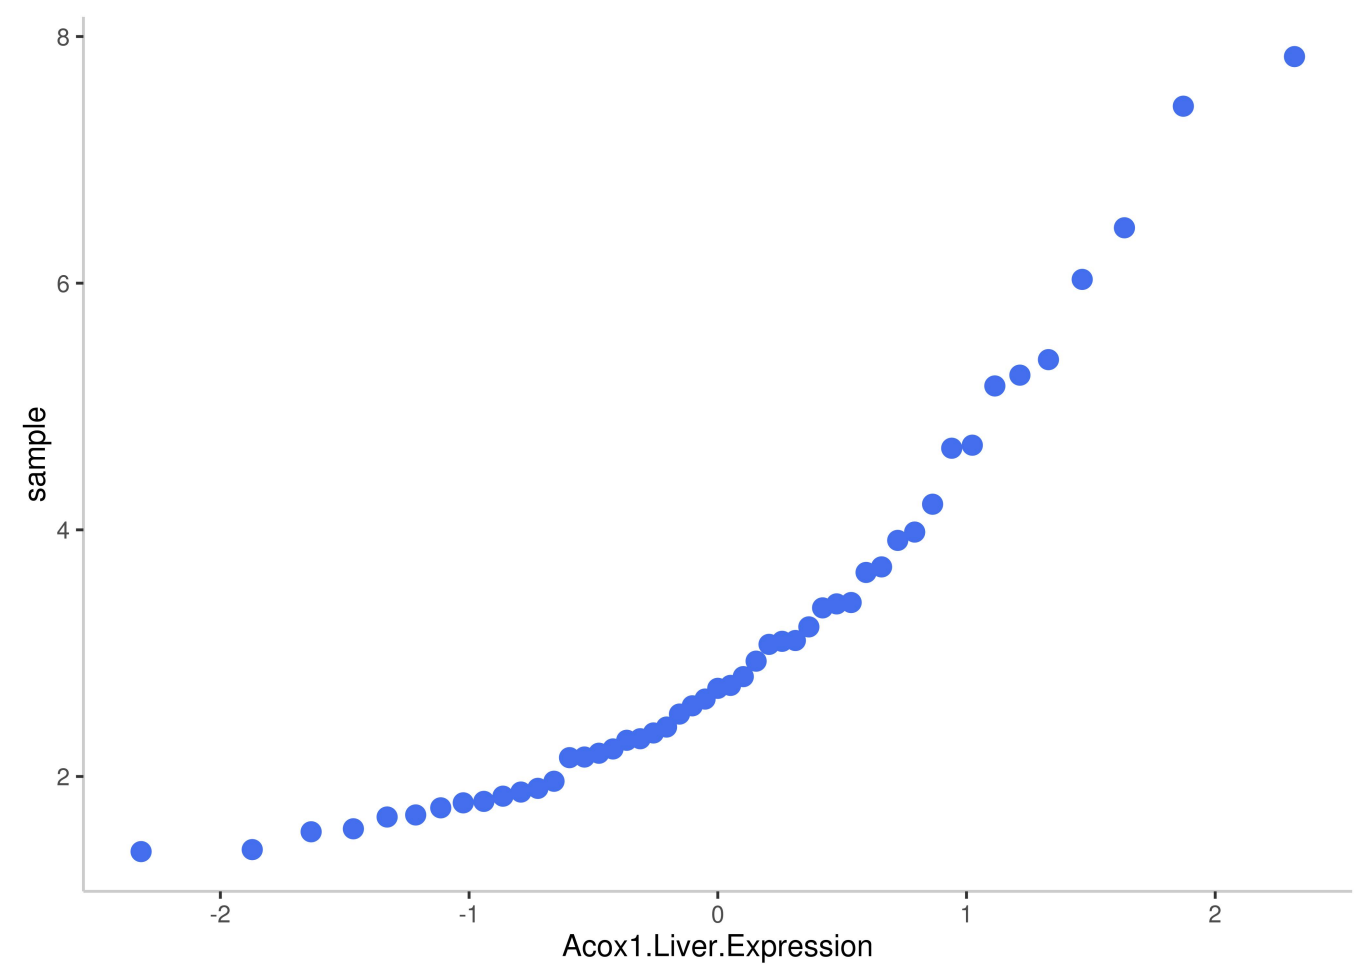

## Warning: Removed 4 rows containing non-finite values (stat\_qq).

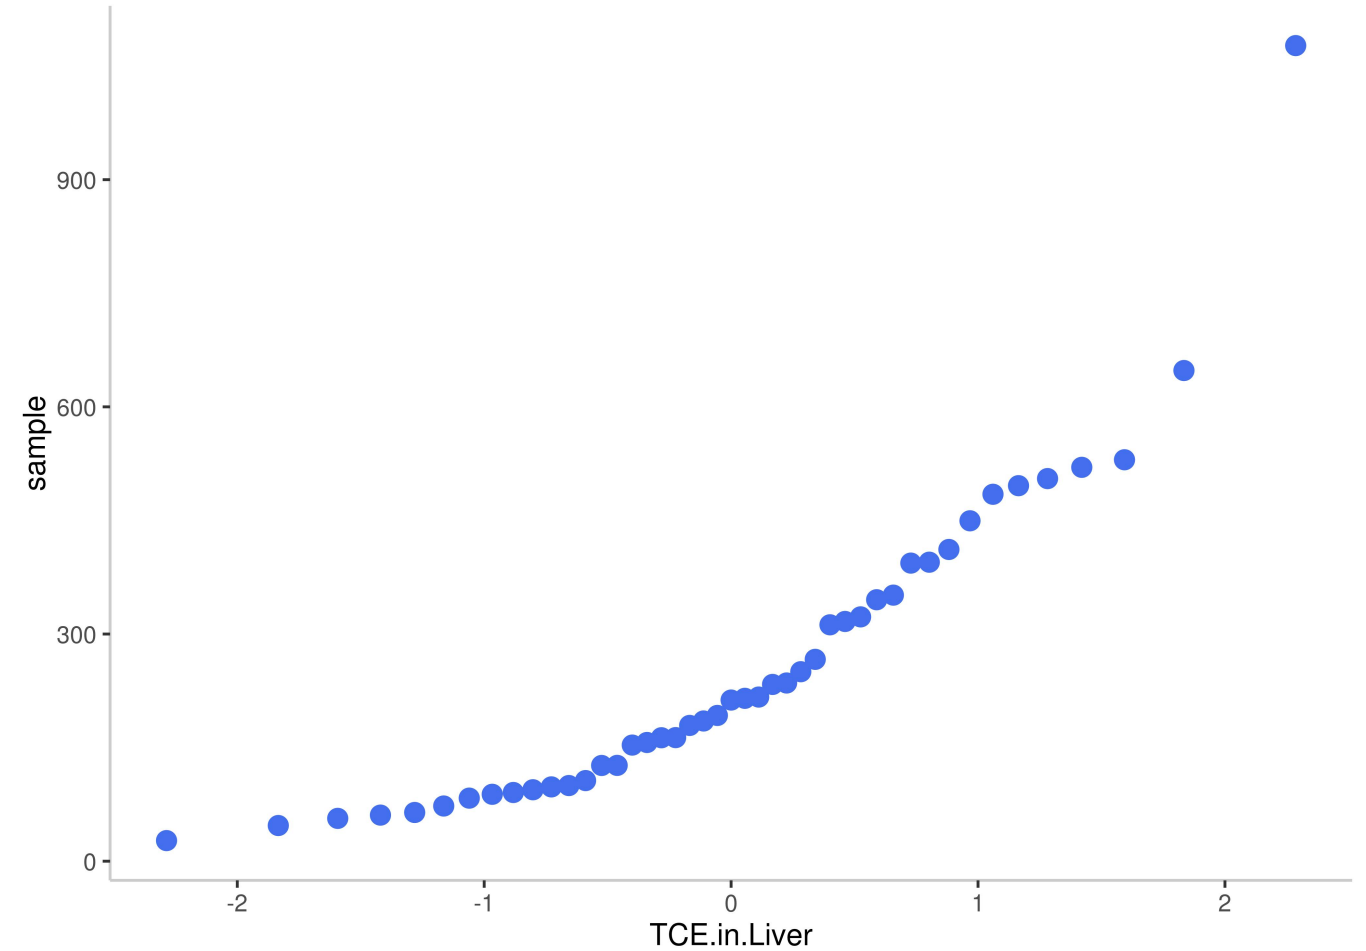

Histogram Plot (Normalized, Data Transformation: Auto)

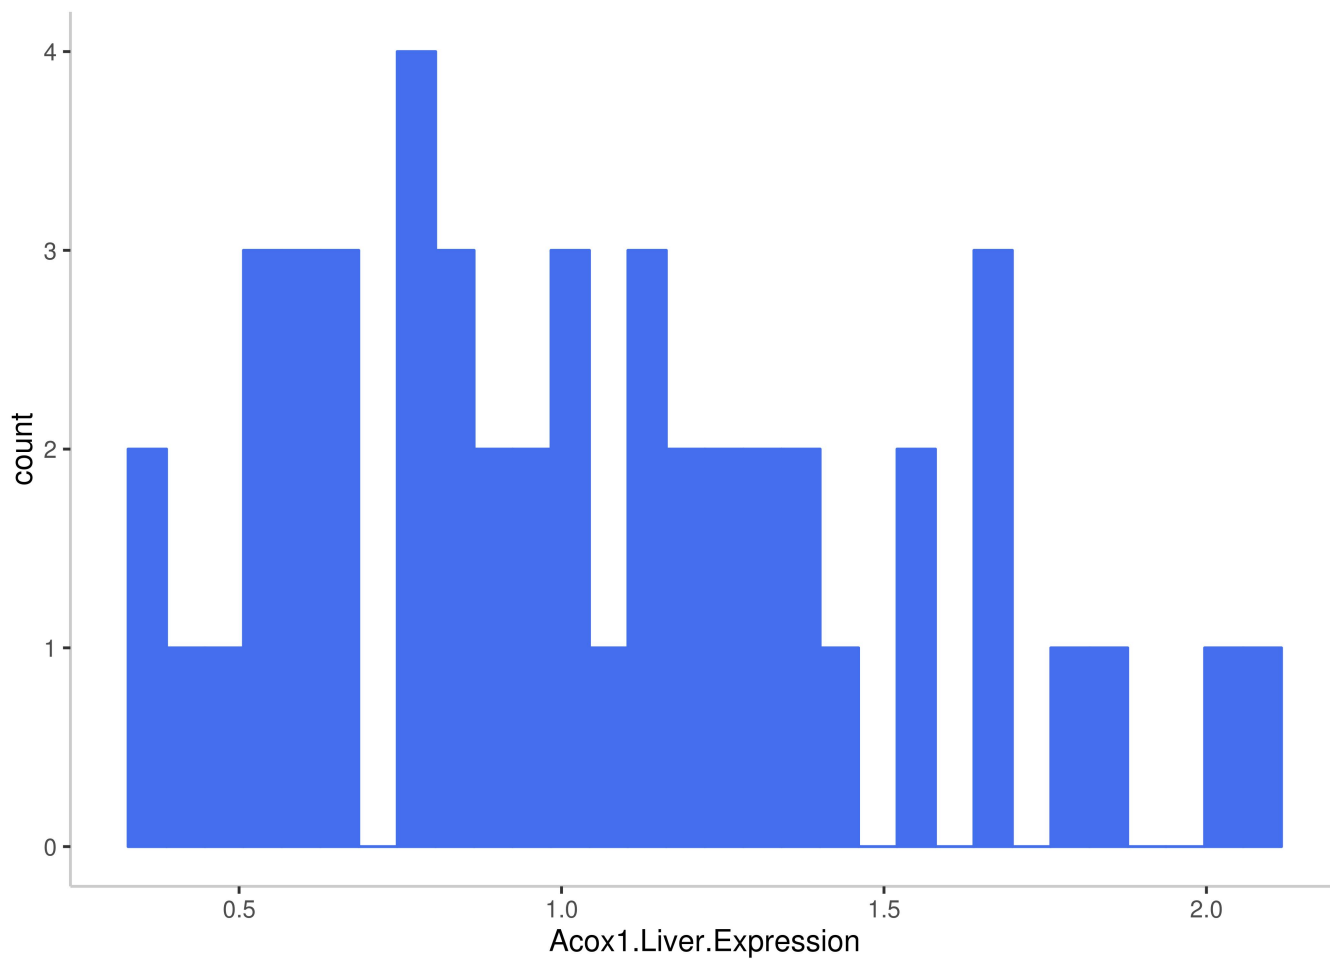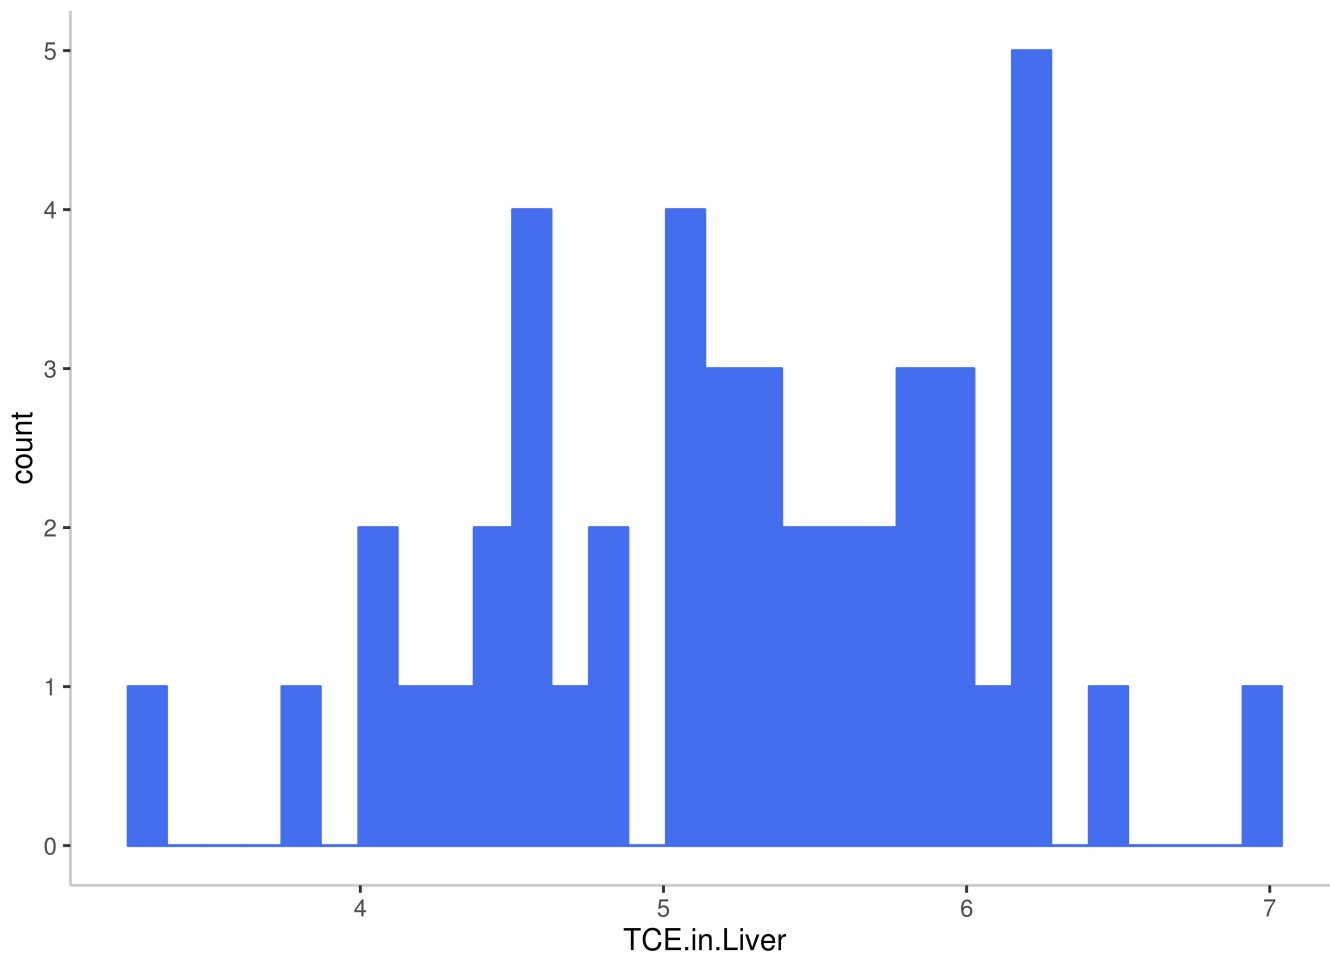

QQ Plot (Normalized, Data Transformation: Auto)

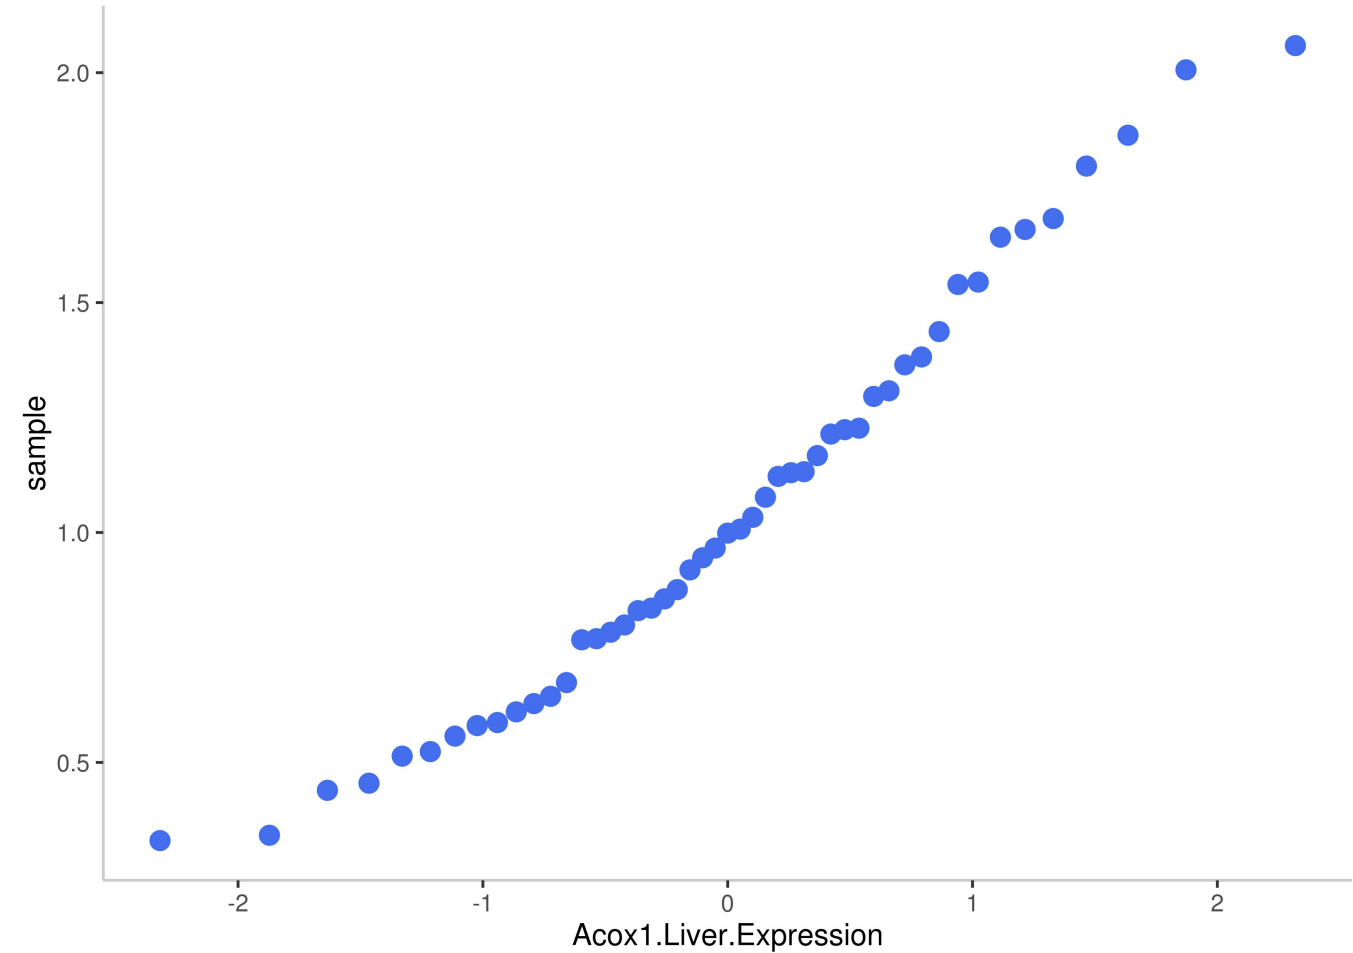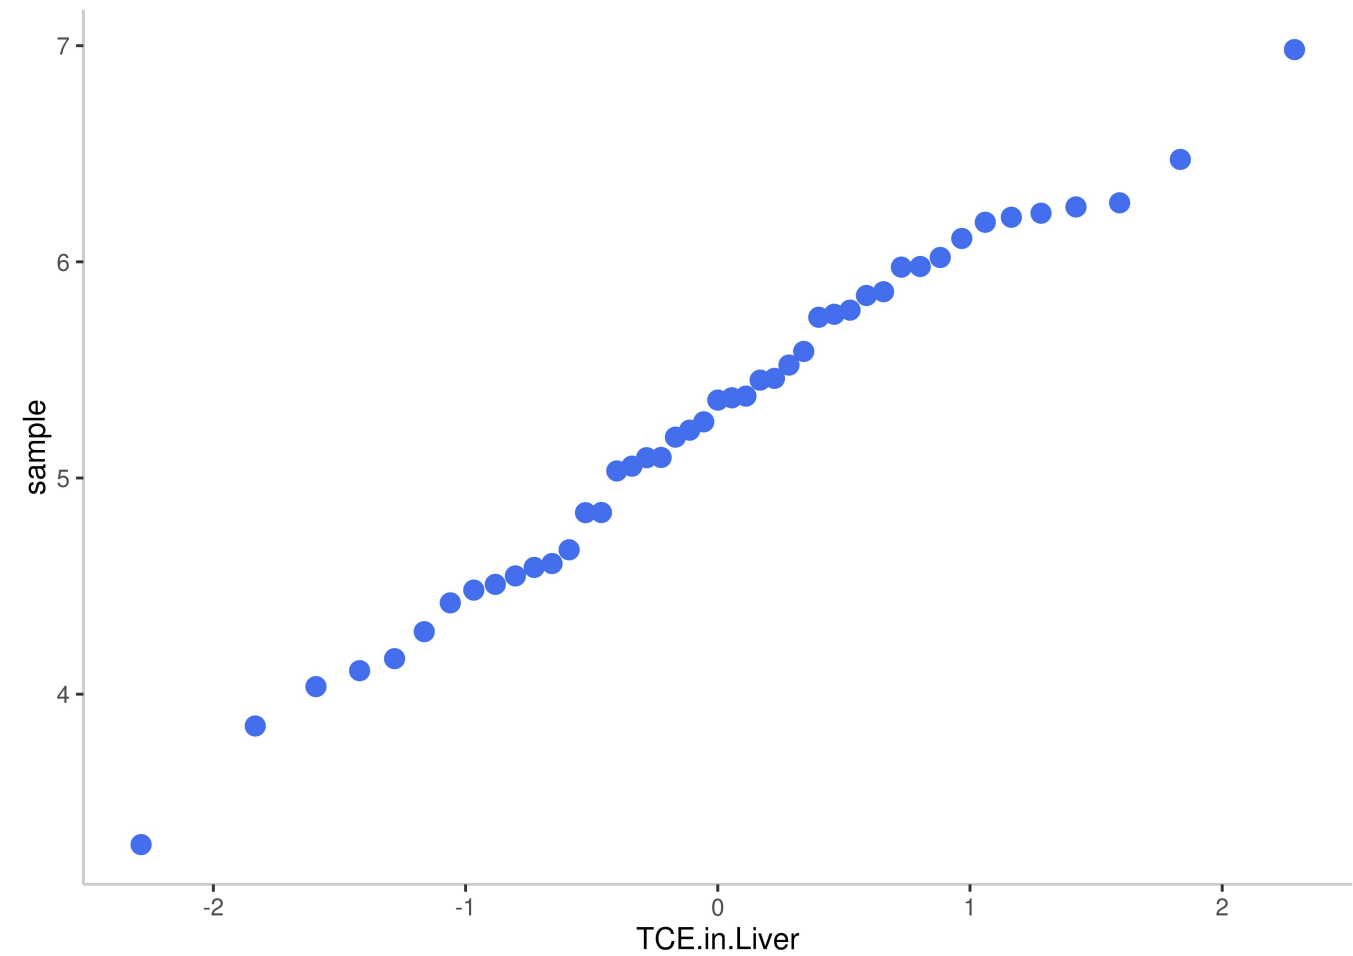

# QTL Analysis

## Significant Thresholds

|                        | 85%      | 90%      | 95%      |
|------------------------|----------|----------|----------|
| Acox1.Liver.Expression | 7.718916 | 7.999829 | 8.539686 |
| TCE.in.Liver           | 7.827359 | 8.153166 | 8.578304 |

## Manhattan Plots

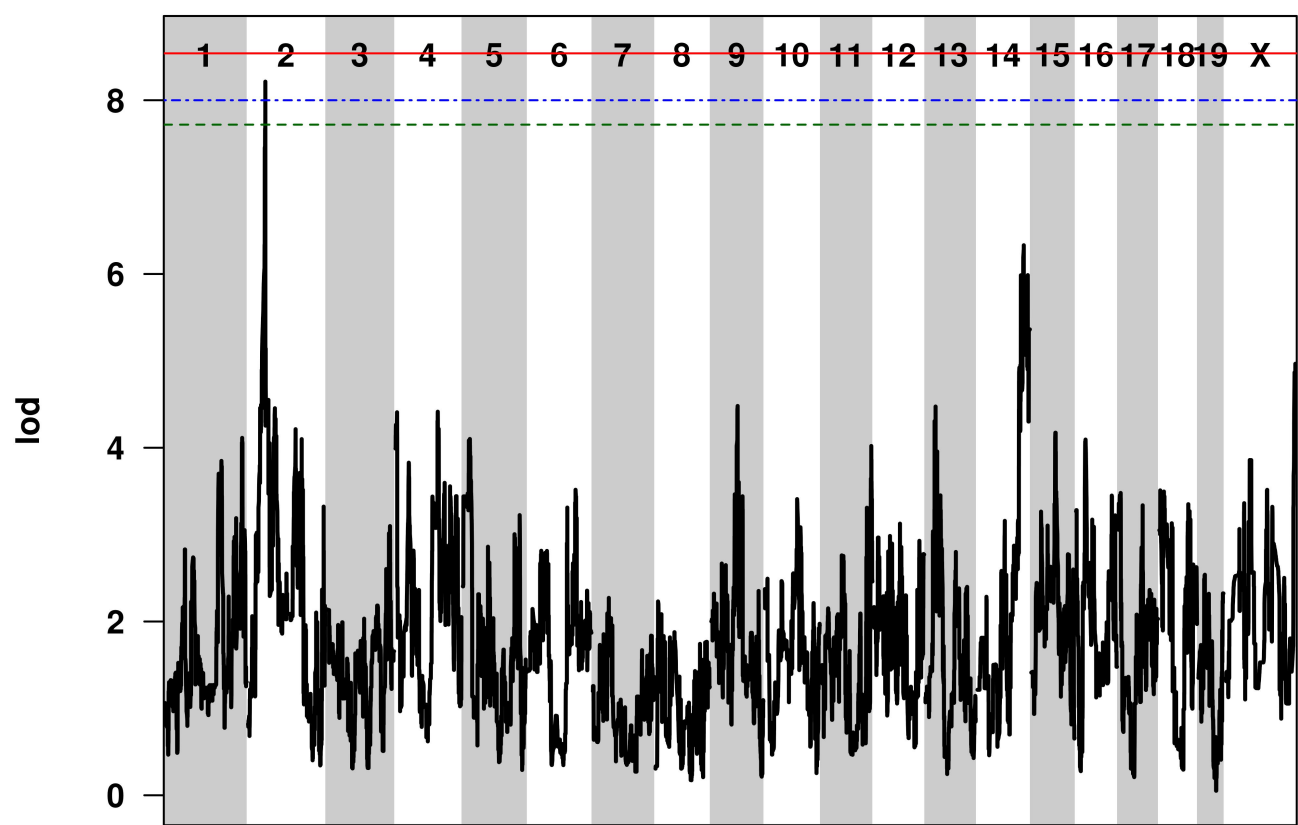

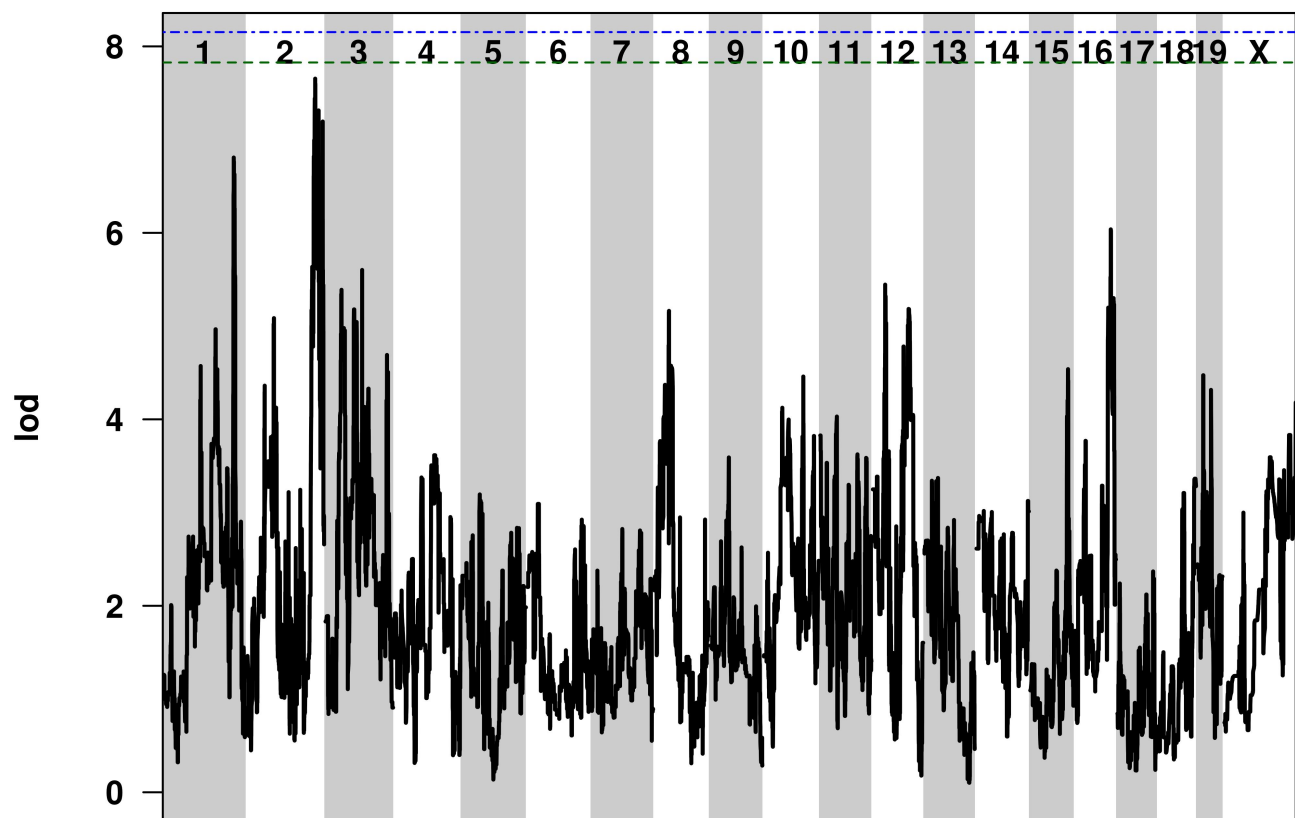

## Significant QTL

All **NA** values for a phenotype means that, significant QTL has not been detected or QTL analysis has not been run.

| Phenotype              | SNP        | Chr | Pos (Mb)  | Pos (cM) | LOD              | P-Value | % Var     | Proximal (Mb) | Distal (Mb) |
|------------------------|------------|-----|-----------|----------|------------------|---------|-----------|---------------|-------------|
| Acox1.Liver.Expression | UNC2949898 | 2   | 43.255497 | 25.522   | 8.21381342152747 | 0       | 53.789325 | 40.747796     | 43.316497   |
| TCE.in.Liver           | NA         | NA  | NA        | NA       | NA               | NA      | NA        | NA            | NA          |

## Allele Effects Plots

The plots may have also been rendered for any additional selected chromosomes.

Acox1.Liver.Expression

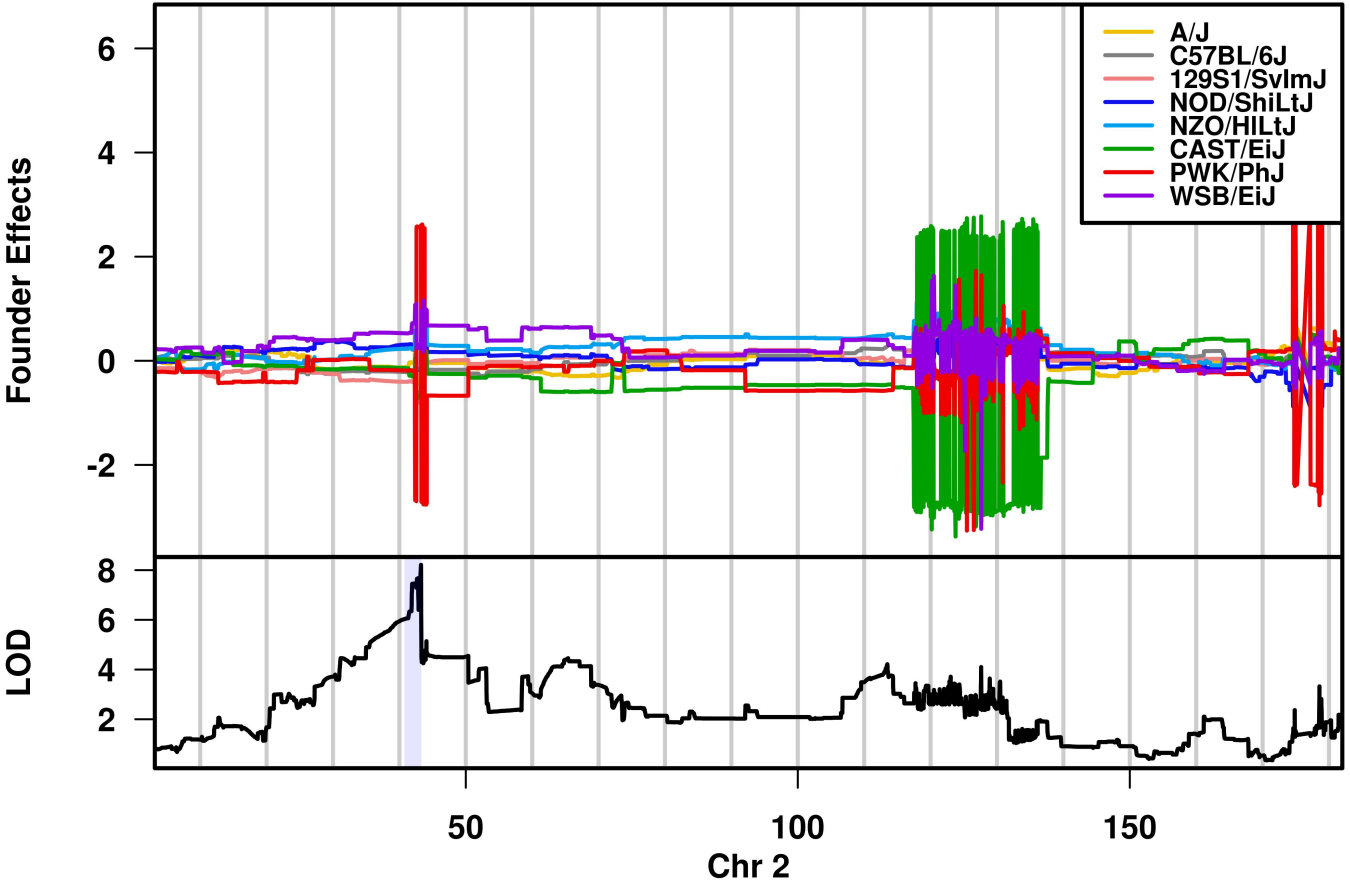

UNC2949898  
Chr 2 : 43255497 Mb

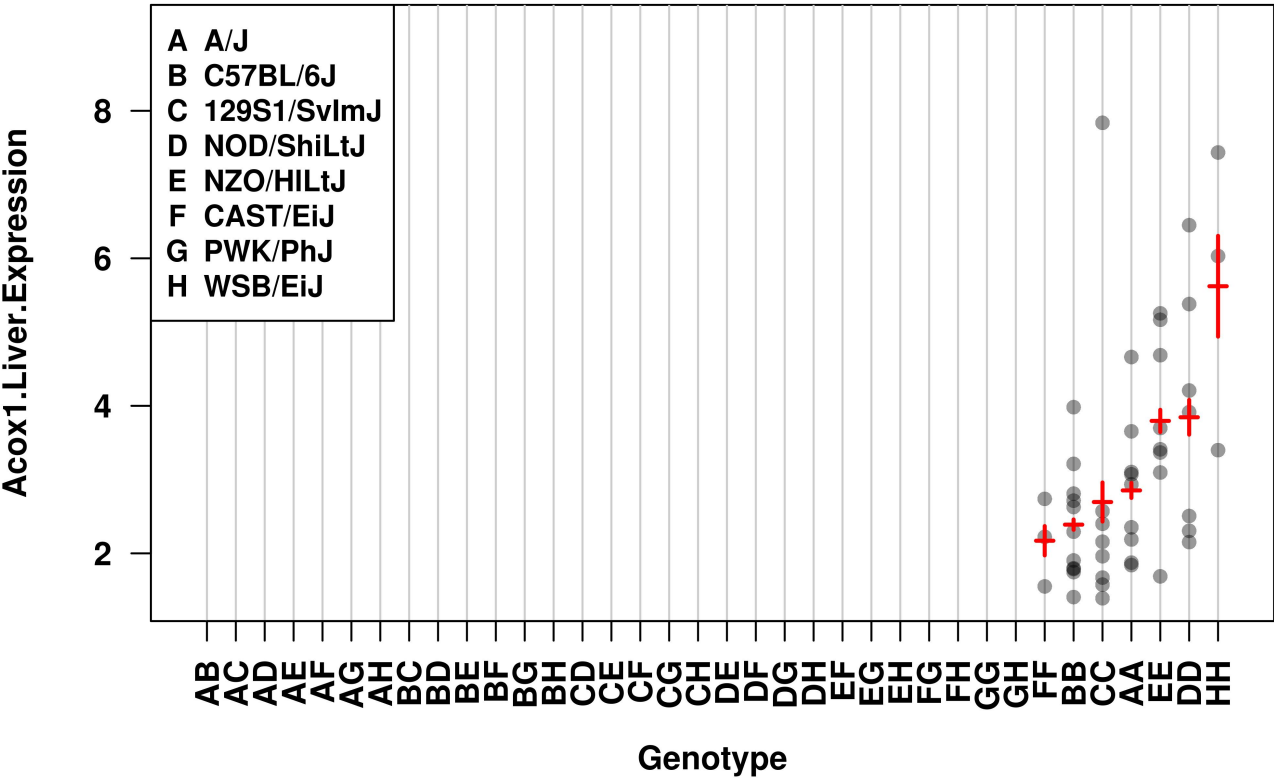

Supplement: Supplementary file 1 [file 1]
